# Supplementary material for: Secondary Structures of MERS-CoV, SARS-CoV, and SARS-CoV-2 Spike Proteins Revealed by Infrared Vibrational Spectroscopy
Source: MDPI journal article supplement (doi:10.3390/ijms24119550), 2023-05-31
Supplement: s1 [file s1]

$\frac{1}{2}$

#-----  
#-----
