# Supplementary material for: Secondary Structures of MERS-CoV, SARS-CoV, and SARS-CoV-2 Spike Proteins Revealed by Infrared Vibrational Spectroscopy
Source: MDPI journal article supplement (doi:10.3390/ijms24119550), 2023-05-31
Supplement: s1 [file s1]

```
#####
# Program: needle
# Rundate: Wed 11 Jan 2023 08:51:55
# Commandline: needle
#   -auto
#   -stdout
#   -asequence emboss_needle-I20230111-085117-0674-7138694-p1m.asequence
#   -bsequence emboss_needle-I20230111-085117-0674-7138694-p1m.bsequence
#   -datafile EBLOSUM62
#   -gapopen 10.0
#   -gapextend 0.5
#   -endopen 10.0
#   -endextend 0.5
#   -aformat3 pair
#   -sprotein1
#   -sprotein2
# Align_format: pair
# Report_file: stdout
#####

#=====
#
# Aligned_sequences: 2
# 1: SARS-CoV-2
# 2: SARS-CoV
# Matrix: EBLOSUM62
# Gap_penalty: 10.0
# Extend_penalty: 0.5
#
# Length: 74
# Identity:      40/74 (54.1%)
# Similarity:    45/74 (60.8%)
# Gaps:          5/74 ( 6.8%)
# Score: 207.0
#
#
#=====

SARS-CoV-2      1  --LYRLFRKSNLKPFERDISTEIYQAGSTPCNGVEGFNCYFPLQSYGFQP      48
                  .||..|...|:|||||...:....||. ....|||:|...|||..
SARS-CoV        1  NYKYRYLRHGKLRPFERDISNVPFSPDGKPCT-PPALNCYWPLNDYGFYT      49

SARS-CoV-2      49  TNGVGYQPYRVVLSFELLHAPAT      72
                  |.:|||||||||||||||:|
SARS-CoV        50  TTGIGYQPYRVVLSFELLNAP--      71

#-----
#-----
```
