# Supplementary material for: Secondary Structures of MERS-CoV, SARS-CoV, and SARS-CoV-2 Spike Proteins Revealed by Infrared Vibrational Spectroscopy
Source: MDPI journal article supplement (doi:10.3390/ijms24119550), 2023-05-31
Supplement: s1 [file s1]

#####

```
# Program: needle
# Rundate: Wed 11 Jan 2023 08:39:38
# Commandline: needle
#   -auto
#   -stdout
#   -asequence emboss_needle-I20230111-083937-0108-9752-p2m.asequence
#   -bsequence emboss_needle-I20230111-083937-0108-9752-p2m.bsequence
#   -datafile EBLOSUM62
#   -gapopen 10.0
#   -gapextend 0.5
#   -endopen 10.0
#   -endextend 0.5
#   -aformat3 pair
#   -sprotein1
#   -sprotein2
# Align_format: pair
# Report_file: stdout
```

#####

#=====

```
#
# Aligned_sequences: 2
# 1: MERS-CoV
# 2: SARS-CoV
# Matrix: EBLOSUM62
# Gap_penalty: 10.0
# Extend_penalty: 0.5
#
# Length: 803
# Identity:      190/803 (23.7%)
# Similarity:    292/803 (36.4%)
# Gaps:          222/803 (27.6%)
# Score: 383.5
#
#
#=====
```

|          |     |                                                    |     |
|----------|-----|----------------------------------------------------|-----|
| MERS-CoV | 1   | YVDVGPDSVKSACIEVDIQTFDDKTWPRPID-VSKADGIIYPQGRITYSN | 49  |
|          |     | .: ...  ... ... . ... : ... :                      |     |
| SARS-CoV | 1   | -----SDLDRCTTFDDVQAPNYTQHTSSMRGVVYPDEIFRSD         | 37  |
| MERS-CoV | 50  | ITITYQGLF-PYQGDHGDYVYSAGHATGTTTPQKLFVANYSQD--VKQFA | 96  |
|          |     | ..... ... :    :   ..... :   .. .                  |     |
| SARS-CoV | 38  | TLYLTQDLFLPF-----YS--NVTG-----FHTINHTFDNPVIPFK     | 71  |
| MERS-CoV | 97  | NGF-----VVR---IGAAAN--STGTVIISPSTSATIRKI-----      | 126 |
|          |     | : .     ...   ... : ... ..                         |     |
| SARS-CoV | 72  | DGIYFAATEKSNVVRGWVFGSTMNKSQSVIIINNSTNVVIRACNFELCD  | 121 |
| MERS-CoV | 127 | YPAFMLGSSVGNFSDGKMGRFFNHTLVLLPDGCGTLLRAFYCILEPRSGN | 176 |
|          |     | . . :.... ...:   :..   ... . .                     |     |
| SARS-CoV | 122 | NPFFFAVSKPMGTQT-----HTMIF--D-----NAFNCTFE-----     | 149 |
| MERS-CoV | 177 | HCPAGNSYTSFATYHTPATDCSD--GNYNRNASLNSFKEYFNLRNCTFMY | 224 |
|          |     | ...  .: ...    :.. .: :..... :                     |     |
| SARS-CoV | 150 | -----YISDAF-----SLDVSEKSGNFKH-----LREFVFKNKDGLY    | 182 |
| MERS-CoV | 225 | TY-----NITEDEILEWFGITQTAQGVHLFSSRYVDLYGGNMFQFATL-  | 267 |
|          |     | .  :...  ... :..... ... ...:                       |     |
| SARS-CoV | 183 | VYKGYPIDVVRD-----LPSGFNTLKPIFKLPLGINITNFRAIL       | 222 |
| MERS-CoV | 268 | ----PVYDTIKYYSIIPHSIRSIQSDRKAW----AAFYVYKLQPLTFLLD | 309 |
|          |     | ..     ... ... : ...                               |     |
| SARS-CoV | 223 | TAFSPAQDT-----WGTSAAAYFVGYLKPTTFMLK                | 252 |
| MERS-CoV | 310 | FSDVGYIRRAIDCGFNDLSQLHCSYESFDVESGVYSVSSFEAKPSGSVVE | 359 |
|          |     | :... . ... : ... : ... : ... : ... : ... : ...     |     |

#-----  
#-----
