# Supplementary material for: Secondary Structures of MERS-CoV, SARS-CoV, and SARS-CoV-2 Spike Proteins Revealed by Infrared Vibrational Spectroscopy
Source: MDPI journal article supplement (doi:10.3390/ijms24119550), 2023-05-31
Supplement: s1 [file s1]

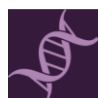

Supporting Information

# Secondary Structures of MERS-CoV, SARS-CoV, and SARS-CoV-2 Spike Proteins Revealed by Infrared Vibrational Spectroscopy

Annalisa D'Arco <sup>1,2,\*</sup>, Marta Di Fabrizio <sup>3</sup>, Tiziana Mancini <sup>2,\*</sup>, Rosanna Mosetti <sup>2</sup>, Salvatore Macis <sup>2</sup>, Giovanna Tranfo <sup>4</sup>, Giancarlo Della Ventura <sup>1,5</sup>, Augusto Marcelli <sup>1,6</sup>, Massimo Petrarca <sup>7,8</sup> and Stefano Lupi <sup>2,7</sup>

<sup>1</sup> Laboratori Nazionali Frascati, National Institute for Nuclear Physics (INFN-LNF), Via E. Fermi 54, 00044 Frascati, Italy; giancarlo.dellaventura@uniroma3.it (G.D.V.); augusto.marcelli@lnf.infn.it (A.M.)

<sup>2</sup> Department of Physics, University of Rome 'La Sapienza', P.le A. Moro 2, 00185 Rome, Italy; mosetti.1766934@studenti.uniroma1.it (R.M.); salvatore.macis@uniroma1.it (S.M.); stefano.lupi@roma1.infn.it (S.L.)

<sup>3</sup> Laboratory of Biological Electron Microscopy, School of Basic Sciences, Institute of Physics, EPFL & Department of Fundamental Microbiology, Faculty of Biology and Medicine, UNIL, 1015 Lausanne, Switzerland; marta.difabrizio@epfl.ch

<sup>4</sup> Department of Occupational and Environmental Medicine, Epidemiology and Hygiene, INAIL, Monte Porzio Catone, 00078 Rome, Italy; g.tranfo@inail.it

<sup>5</sup> Department of Science, University Rome Tre, Largo San Leonardo Murialdo 1, 00146 Rome, Italy

<sup>6</sup> Rome International Centre for Materials Science Superstipes, Via dei Sabelli 119A, 00185 Rome, Italy

<sup>7</sup> National Institute for Nuclear Physics Section Rome1, P.le A. Moro 2, 00185 Rome, Italy; massimo.petrarca@uniroma1.it

<sup>8</sup> Department of Basic and Applied Sciences for Engineering (SBAI), University of Rome 'La Sapienza', Via Scarpa 16, 00161 Rome, Italy

\* Correspondence: annalisa.darco@uniroma1.it (A.D.); tiziana.mancini@uniroma1.it (T.M.)

**Citation:** D'Arco, A.; Di Fabrizio, M.; Mancini, T.; Mosetti, R.; Macis, S.; Tranfo, G.; Della Ventura, G.; Marcelli, A.; Petrarca, M.; Lupi, S. Secondary Structures of MERS-CoV, SARS-CoV, and SARS-CoV-2 Spike Proteins Revealed by Infrared Vibrational Spectroscopy. *Int. J. Mol. Sci.* **2023**, *24*, 9550. <https://doi.org/10.3390/ijms24119550>

Academic Editor: Mahmoud Ghomi

Received: 28 February 2023

Revised: 28 April 2023

Accepted: 26 May 2023

Published: 31 May 2023

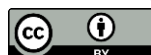

**Copyright:** © 2023 by the authors. Licensee MDPI, Basel, Switzerland. This article is an open access article distributed under the terms and conditions of the Creative Commons Attribution (CC BY) license (<https://creativecommons.org/licenses/by/4.0/>).

## S1. Amino acid sequences

### S1.1. MERS-CoV S1

YVDVGPDSVKSACIEVDIQQTFDDKTWPRPIDVSKADGIIYPQGRYTSNITITYQGLFPY  
QGDHGDMMYVYSAGHATGTTTPQKLFVANYSQDVKQFANGFVVRIGAAANSTGTVIIIS  
PSTSATIRKIYPAFMLGSSVGNFSDGKMGRFFNHTLVLLPDGCGTLLRAFYCILEPRSG  
NHCPAGNSYTSFATYHTPATDCSDGNYNRNASLNSFKEYFNLRNCTFMYTYNITEDE  
ILEWFGITQTAQGVHLFSSRYVDLYGGNMFQFATLPVYDTIKYYSIIPHSIRSIQSDRKA  
WAAFYVYKLQPLTFLLDVSDGYIRRAIDCGFNDLSQLHCSYESFDVESGVYSVSSFEA  
KPSGVSVEQAEGVECDSPLLSGTPPVYNFKRLVFTNCNYNLTLLSLFSVNDFTCSQ  
ISPAAIASNCYSSLILDYFSYPLSMKSDLSVSSAGPISQFNYKQSFNPTCLILATVPHNLT  
TITKPLKYSYINKCSRLLSDDRTEVPQLVNANQYSPCVSIVPSTVWEDGDYRQKLSPL  
EGGGWLVASGSTVAMTEQLQMFGITVQYGTDTNSVCPKLEFANDTKIASQLGNCV  
EYSLYGVSGRGVFQNTAVGVRQQRFFVYDAYQNLVGYSDDGNYCYLRACVSPVPS  
VIYDKETKTHATLFGSVACEHISSTMSQYSRSTRSMLKRRDSTYGPLQTPVGCVLGLVN  
SSLFVEAHHHHHHHHHHH

### S1.2. SARS-CoV S1

SDLDRCTTFDDVQAPNYTQHTSSMRGVYYPDEIFRSDTLYLTQDLFLPFYSNVTGFHTI  
NHTFDNPVIFPKDGIYFAATEKSNVVRGWVFGSTMNNKSQSVIIINNSTNVVIRACNF  
ELCDNPFPAVSKPMGTQHTMIFDNANFCTFEYISDAFSLDVSEKSGNFKHLREFVFK  
NKDGLYVYKGYQPIDVVRDLPSGFNTLKPIFKLPLGINITNFRAILTAFAQDQWTGT  
SAAAYFVGYLKPTTFMLKYDENGITDAVDCSQNPLAELKCSVKSFEIDKGIYQTSNFR  
VVPBGDVVRFPNITNLCPFGEVFNATKFPVYAWERKKISNCVADYSVLNSTFFSTFK

CYGVSATKLNDLCFSNVYADSFVVKGDDVRQIAPGQTGVIADYNYKLPPDDFMGCVL  
 AWNTRNIDATSTGNVNYKYRYLRHGKLRPFERDISNVPFSPDGKPTPPALNCYWPL  
 NDYGFYTTTGIGYQPYRVVLSFELLNAPATVCGPKLSTDLIKNQCVNFNFNGLTGTG  
 VLTPSSKRFPFQQFGRDVSDFDTSVRDPKTSEILDISPCSFGGVSVITPGTNASSEVAVL  
 YQDVNCTDVSTAIHADQLTPAWRIYSTGNNVFQTQAGCLIGAHEVDTSYECDIPIGA  
 GICASYHTVSLRAHHHHHHHHHHH

### S1.3. SARS-CoV-2 S1

VNLTTRTQLPPAYTNSFTRGVYYPDKVFRSSVLHSTQDLFLPFFSNVTWFWHAIHVSNTN  
 GTKRFDNPVLPFNDGVYFASTEKSNIIRGWIFGTTLDSKTQSLIVNNAATNVVIKVECF  
 QFCNDPFLGVYYHKNNKSWMESEFRVYSSANNCTFEYVSQPFLLMDLEGKQGNFKNL  
 REFVFKNIDGYFKIYSKHTPINLVRDLPGFSALEPLVDLPIGINITRFQTLALHRSYLT  
 PGDSSSGWTAGAAAYVGYLQPRTFLLKYNENGTITDAVDCALDPLSETKCTLKSFTV  
 EKGIIQTSNFRVQPTESIVRFPNITNLCPFGEVFNATRFASVYAWNKRISNCVADYSV  
 LYNASFSSTFKCYGVSPTKLNDLCFTNVYADSFVIRGDEVQRQIAPGQTGKIADYNYKL  
 DDFTGCVIAWNSNNLDSKVGGNYNYLYRLFRKSNLKPFERDISTEIQAGSTPCNGVE  
 GFNCYFPLQSYGFQPTNGVGYQPYRVVLSFELLHAPATVCGPKKSTNLVKNKCVNF  
 NFNGLTGTGVLTESNKKFLPFQQFGRDIADTTDAVRDPQTLEILDITPCSFGGVSVITP  
 GTNTSNQVAVLYQDVNCTEVPVAIHADQLTPTWRVYSTGSNVFQTRAGCLIGAHEV  
 NNSYECDIPIGAGICASYQTQTNSPRRARAHHHHHHHHHHHH

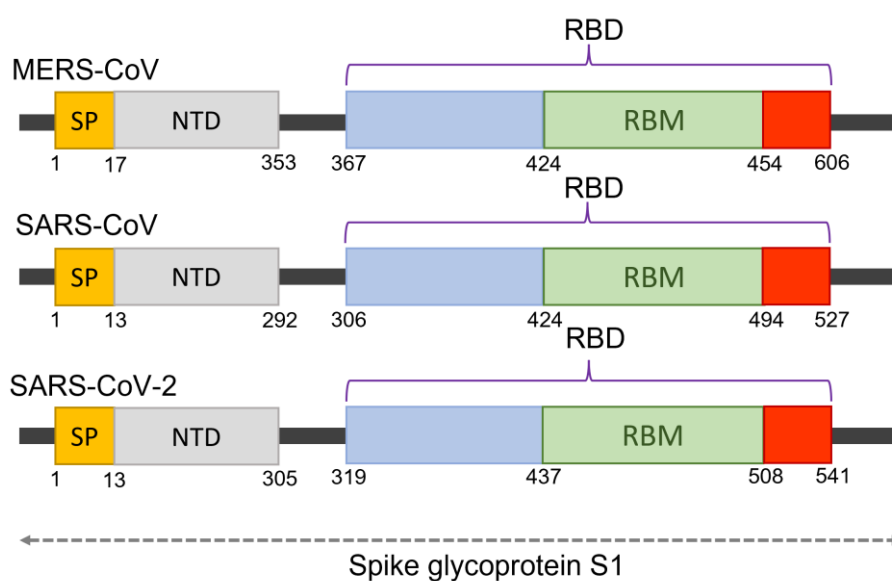

**Figure S1.** Molecular structures of MERS-CoV, SARS-CoV, and SARS-CoV-2 spike glycoprotein subunits 1.

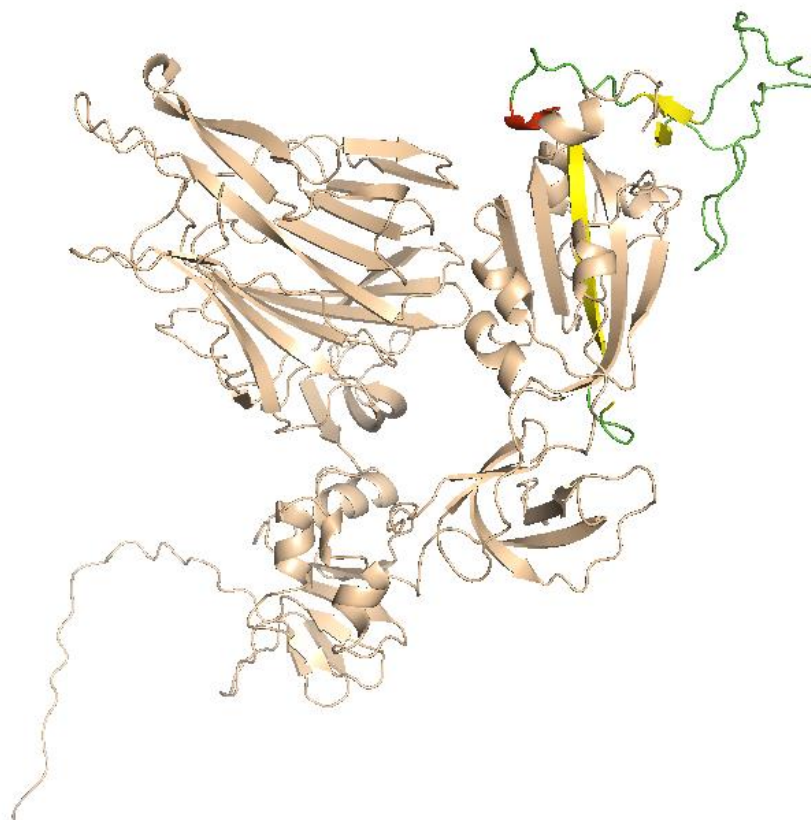

**Figure S2.** 3D visualization of SARS-CoV-2 S1 fragment in pyMOL. RBM is highlighted with the color palette (red, green, yellow).

## S2. Global alignment of S1 proteins

For the protein alignment, we used the Pairwise Sequence Alignment Emboss Needle ([https://www.ebi.ac.uk/Tools/psa/emboss\\_needle/](https://www.ebi.ac.uk/Tools/psa/emboss_needle/)) program. Here, we reported the alignment filenames of the S1, NTD, RBD, and RBM.

- MERS-CoVvsSARS-CoV S1.pdf
- MERS-CoVvsSARS-CoV2 S1.pdf
- SARS-CoVvsSARS-CoV2 S1.pdf
- SARS-CoVvsSARS-CoV2 NTD.pdf
- SARS-CoVvsSARS-CoV2 RBD.pdf
- SARS-CoVvsSARS-CoV2 RBM.pdf

### S3. Comparison of SARS-CoV-2 S1 protein at different concentration

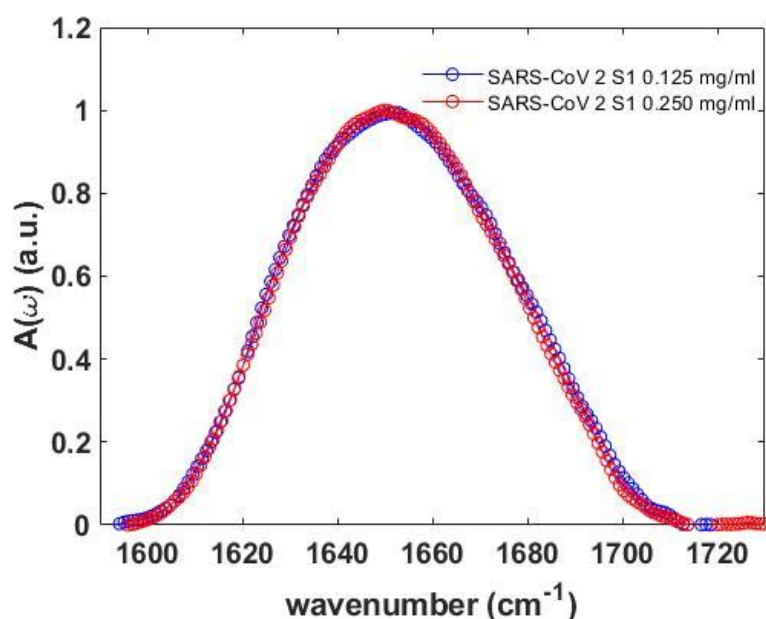

**Figure S3.** Comparison of normalized amide I SARS-CoV-2 S1 absorption spectra at different concentrations (blue and red circle lines refer to 0.125 mg/ml and 0.250 mg/ml, respectively). An excellent reproducibility of absorption data can be observed.

### S4. Secondary structure assignment for SARS-CoV2 S1 protein vs. pH

The main effect of pH concerns, firstly, regards the  $\alpha$ -structure (see Table S1), which gave rise to a main absorption band at  $1658\text{ cm}^{-1}$  at a  $\text{pH} = 7.4$  [1–11]. This component remained nearly constant in frequency ( $1658\text{--}1659\text{ cm}^{-1}$ ) for pH when moving from 7.4 to 5.5, while it shifted to a lower frequency (around  $1653\text{ cm}^{-1}$ ) at alkaline pH levels. Moreover, its intensity remained nearly constant for acid and serological pHs and increased for alkaline pHs (see Figure 4, main text). The band at  $1643\text{ cm}^{-1}$  for a 7.4 pH was associated with random coils, which was also influenced by pH variation, and showed blue-shifting to  $1645\text{ cm}^{-1}$  for acid and alkaline pHs. Its intensity was maximized at the serological pH value and minimized at the 4.55 pH (see Figure 4, in main text). The extended  $\beta$ -sheet located around  $1619\text{ cm}^{-1}$  at the serological and mild acidic and alkaline pHs instead red-shifted for extreme pHs. The other  $\beta$ -sheet components were located between  $1620\text{--}1640\text{ cm}^{-1}$  and around  $1690\text{ cm}^{-1}$  (see Table S1 in supporting information) at a  $\text{pH} = 7.4$ . The band at  $1629\text{ cm}^{-1}$  was red-shifted at  $1623\text{ cm}^{-1}$  at 4.55 pH levels, suggesting the aggregation of sheets with a large number of strands [1,10], and blue-shifted at  $1633\text{ cm}^{-1}$  for alkaline pHs. The absorption of the  $\beta$ -sheet for  $\text{pH} = 4.55$  and 5.5 was related to a new band at  $1637\text{ cm}^{-1}$ . Finally, the absorption at  $1693\text{ cm}^{-1}$  disappeared for extreme alkaline pH values. The total intensity of the  $\beta$ -sheet (see Figure 4), presented a minimum at the serological pH and was maximized at acid pHs. The bands in the  $1666\text{--}1678\text{ cm}^{-1}$  range, assigned to  $\beta$ -turn structures [1,5,7,8,10,11], were blue-shifted compared to their spectral positions at the 7.4 pH, while a new band appeared around  $1686\text{ cm}^{-1}$  for the pH values of 4.55, 8.8, and 11.2. The total intensity of the  $\beta$ -turn structures, which showed a maximum at a  $\text{pH} = 7.4$ , reduced at both acid and alkaline pHs.

**Table S1.** Secondary structure assignments for SARS-CoV-2 S1 units as function of pH as derived from IR data analysis. The quantitative structural evaluation ( $\alpha$ -helix,  $\beta$ -sheet,  $\beta$ -turn, and random coils) is based on a global fitting through Gaussian components [1–11].

| pH 4.55<br>Peak<br>Frequency<br>[cm <sup>-1</sup> ] | pH 4.55<br>Relative<br>integrated<br>Intensity<br>[%] | pH 5.5 Peak<br>frequency<br>[cm <sup>-1</sup> ] | pH 5.5<br>Relative<br>integrated<br>Intensity<br>[%] | pH 7.4 Peak<br>frequency<br>[cm <sup>-1</sup> ] | pH 7.4 Rela-<br>tive<br>integrated<br>Intensity<br>[%] | pH 8.8 Peak<br>frequency<br>[cm <sup>-1</sup> ] | pH 8.8<br>Relative<br>integrated<br>Intensity<br>[%] | pH 11.2<br>Peak<br>frequency<br>[cm <sup>-1</sup> ] | pH 11.2<br>Relative<br>integrated<br>Intensity<br>[%] | Peaks<br>Assignment               |
|-----------------------------------------------------|-------------------------------------------------------|-------------------------------------------------|------------------------------------------------------|-------------------------------------------------|--------------------------------------------------------|-------------------------------------------------|------------------------------------------------------|-----------------------------------------------------|-------------------------------------------------------|-----------------------------------|
| 1618                                                | 15.7                                                  | 1619                                            | 19.2                                                 | 1619                                            | 5.2                                                    | 1619                                            | 11.6                                                 | 1616                                                | 12.4                                                  | $\beta$ -sheet<br>(extended)      |
| 1623                                                | 8.3                                                   | -                                               | -                                                    | -                                               | -                                                      | -                                               | -                                                    | 1625                                                | 9.1                                                   | $\beta$ -sheet<br>(anti-parallel) |
| 1629                                                | 5.1                                                   | 1629                                            | 14.1                                                 | 1628                                            | 11.4                                                   | -                                               | -                                                    | -                                                   | -                                                     | $\beta$ -sheet                    |
| -                                                   | -                                                     | -                                               | -                                                    | 1633                                            | 9.8                                                    | 1632                                            | 23.6                                                 | 1632                                                | 13.1                                                  | $\beta$ -sheet                    |
| 1637                                                | 12.6                                                  | 1637                                            | 9.7                                                  | -                                               | -                                                      | -                                               | -                                                    | 1637                                                | 6.9                                                   | $\beta$ -sheet                    |
| -                                                   | -                                                     | -                                               | -                                                    | 1643                                            | 12.3                                                   | 1643                                            | 15.1                                                 | -                                                   | -                                                     | Random coil                       |
| 1646                                                | 14.5                                                  | 1645                                            | 15.5                                                 | -                                               | -                                                      | -                                               | -                                                    | 1645                                                | 14.8                                                  | Random coil                       |
| 1655                                                | 18.8                                                  | 1653                                            | 9.7                                                  | 1650                                            | 13.6                                                   | 1653                                            | 12.7                                                 | 1653                                                | 12.2                                                  | $\alpha$ -helix                   |
| -                                                   | -                                                     | 1659                                            | 8.2                                                  | 1658                                            | 15.9                                                   | -                                               | -                                                    | -                                                   | -                                                     | $\alpha$ -helix                   |
| 1663                                                | 4.0                                                   | -                                               | -                                                    | -                                               | -                                                      | 1663                                            | 13.6                                                 | 1661                                                | 10.7                                                  | $\beta$ -turn                     |
| -                                                   | -                                                     | -                                               | -                                                    | 1666                                            | 5.6                                                    | -                                               | -                                                    | -                                                   | -                                                     | $\beta$ -turn                     |
| 1671                                                | 13.3                                                  | 1667                                            | 13.2                                                 | -                                               | -                                                      | -                                               | -                                                    | 1669                                                | 7.9                                                   | $\beta$ -turn                     |
| -                                                   | -                                                     | -                                               | -                                                    | 1673                                            | 6.7                                                    | 1674                                            | 18.9                                                 | 1676                                                | 7.3                                                   | $\beta$ -turn                     |
| -                                                   | -                                                     | 1678                                            | 4.9                                                  | 1678                                            | 15.2                                                   | -                                               | -                                                    | -                                                   | -                                                     | $\beta$ -turn                     |
| 1683                                                | 4.4                                                   | 1684                                            | 2.1                                                  | -                                               | -                                                      | 1686                                            | 4.3                                                  | 1686                                                | 5.5                                                   | $\beta$ -turn                     |
| 1690                                                | 2.8                                                   | 1689                                            | 2.7                                                  | 1693                                            | 4.2                                                    | -                                               | -                                                    | -                                                   | -                                                     | $\beta$ -sheet<br>(anti-parallel) |
| 1700                                                | 0.5                                                   | 1698                                            | 0.7                                                  | -                                               | -                                                      | -                                               | -                                                    | 1700                                                | 0.2                                                   | $\beta$ -sheet<br>(anti-parallel) |

## S5. Glycans

The CoV S glycoproteins were densely decorated by heterogeneous N-linked glycans that are used by viral fusion proteins as a shield to counteract the host immune response [12–21]. These oligosaccharides increase the global stability of the proteins [19–21], participating in S folding [22], and work as recognition sites.

Figure S4 shows the absorbance spectra of the S1 glycoproteins of MERS-CoV (A), SARS-CoV (B), and SARS-CoV-2 (C) in the 900–1180 cm<sup>-1</sup> carbohydrates spectral range. Band overlapping, broadening, and additional bands resulted in quite complex spectra. Despite this, some spectral features were recognized, extrapolated through the second derivative calculation and through a poly-Gaussian fit, and collected in Table S2. In particular, the stretching vibrations of the COH site groups and the glycosidic bonds dominated the region of 900–1180 cm<sup>-1</sup>. Nevertheless, the few intense IR absorbance peaks at 1035 and 1050 cm<sup>-1</sup> could be associated with the formation of polymeric chains, as well as the presence of vibrational bands between 900–1000 cm<sup>-1</sup> and 1150 cm<sup>-1</sup>, which were attributed to  $\nu$ (CO) and C-O-C glycosidic linkage, which may serve as markers for the glycosylation degree [23–26].

Other remarkable absorption bands can be observed in Figure S4. Their assignments were based on previous studies in the literature [19–26]. Bands of the skeletal (ring) vibration of glycosidic linkage were observed in the spectral range 900–950 cm<sup>-1</sup> [23,24]. The peak near 915 cm<sup>-1</sup> was observed in the spectra of Glc, Fuc, and Man monomers; the 945 cm<sup>-1</sup> band could be attributed to a Nan monomer contribution. The bands of the  $\nu$ (CO) mode in COC linkages appeared in the spectral regions encompassing from 965–1000 cm<sup>-1</sup> and 1130–1160 cm<sup>-1</sup>. Other strong contributions came from the absorption bands at 994 cm<sup>-1</sup> and 1035 cm<sup>-1</sup> [19–21,23–26]. The peak around 990 cm<sup>-1</sup> was associated with the coupling of in-plane  $\beta$ (CCH),  $\beta$ (CCO) moieties and was observed in the spectra of the Glc, Gal, and Fuc monomers. This was accompanied by bands at 926 cm<sup>-1</sup> due to the ring and

COH bending modes. The intense peak at  $1035\text{ cm}^{-1}$  was a specific spectral feature attributed to the Man and Fuc monomers.

The bands located around  $1100\text{ cm}^{-1}$  and  $1150\text{ cm}^{-1}$  originated from various couplings of stretching and bending vibrations of the CC and CO bonds. In particular, the absorption near  $1150\text{ cm}^{-1}$  was exclusively attributed to the  $\nu(\text{CO})$  and glycosidic bond. Appreciable differences were not noticeable between the MERS-CoV and SARS-CoV S1 units. In the SARS-CoV-2 S1 unit, slight shifts were observed to a high frequency in the spectral region  $1030\text{--}1120\text{ cm}^{-1}$ , and a new absorption band appeared at  $1015\text{ cm}^{-1}$ . These variations are indicative of different glycan compositions, including the oligosaccharide units and mannose content.

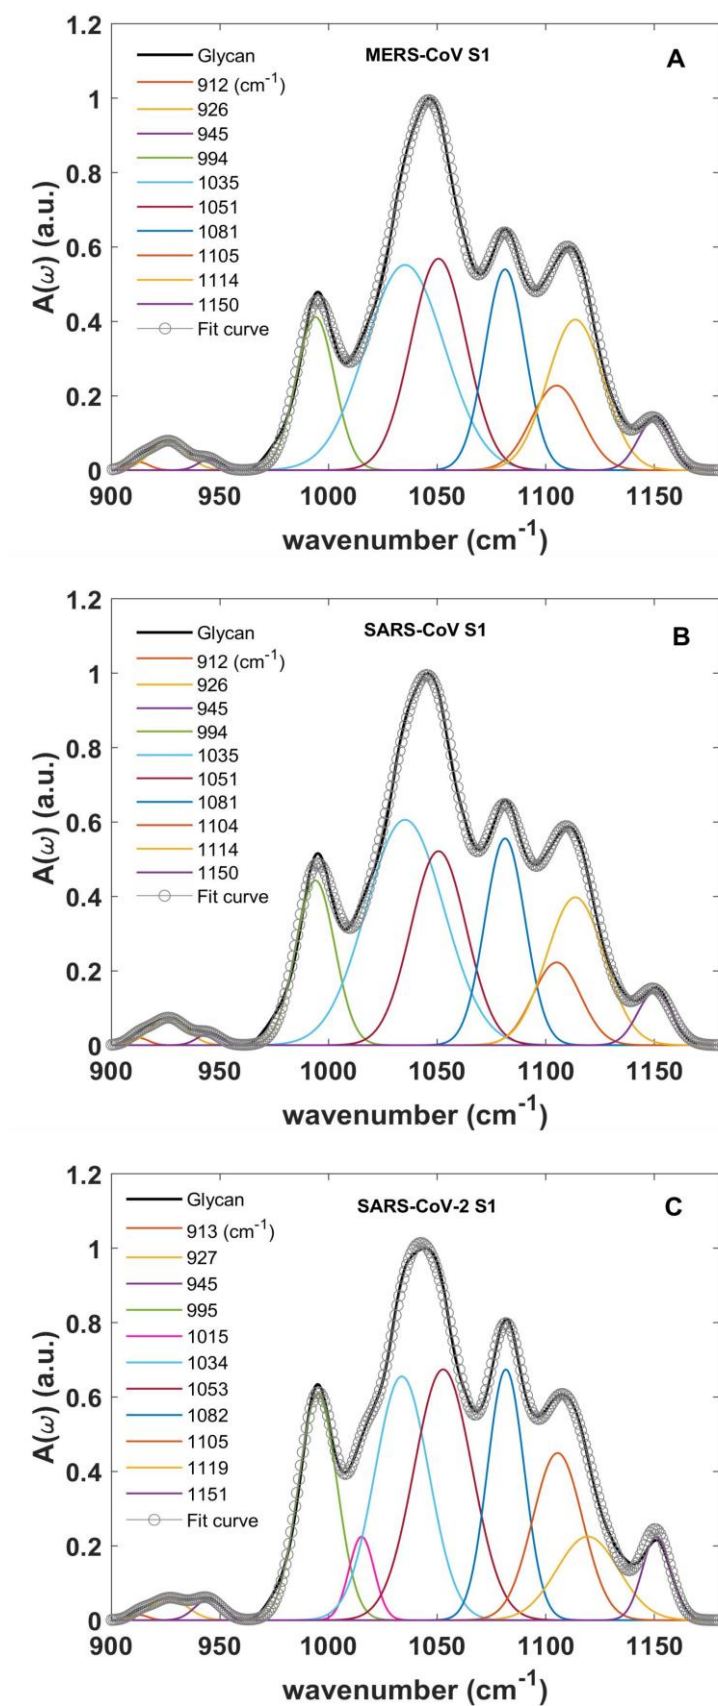

**Figure S4.** Absorption spectra of glycan band (900–1180  $\text{cm}^{-1}$ ). Deconvolution of average spectra in the (A) MERS-CoV; (B) SARS-CoV; and (C) SARS-CoV-2 S1 units are reported.

**Table S2.** Deconvoluted carbohydrates band frequencies and assignments [19–21,23–26].

| MERS-CoV (cm <sup>-1</sup> ) | SARS-CoV (cm <sup>-1</sup> ) | SARS-CoV-2 (cm <sup>-1</sup> ) | Assignments                                                |
|------------------------------|------------------------------|--------------------------------|------------------------------------------------------------|
| 912                          | 913                          | 913                            | Glc, Fuc, Man v(CO), v(CCH), v(CO) in glycosidic linkage   |
| 926                          | 926                          | 926                            | ring modes, v(CO) in glycosidic linkage                    |
| 945                          | 945                          | 945                            | Nan, v(CO) in glycosidic linkage                           |
| 994                          | 994                          | 995                            | (Glc, Gal, Fuc) β(CCH), β(CCO) v(CO) in glycosidic linkage |
| -                            | -                            | 1015                           | Man v(CC) β(COH)                                           |
| 1035                         | 1035                         | 1033                           | Man,Fuc –COH vibration                                     |
| 1051                         | 1051                         | 1052                           | Man Gal v(CC) v(CO) β(COH)                                 |
| 1081                         | 1081                         | 1082                           | Glc β(CH)                                                  |
| 1103                         | 1104                         | 1107                           | Glc, Gal v(CC) v(CO) β(COH)                                |
| 1114                         | 1114                         | 1117                           | Man, Fuc                                                   |
| 1150                         | 1151                         | 1150                           | Gal, Glc, Nan v(CC) v(CO) in glycosidic linkage            |

## References

- Barth, A. The infrared absorption of amino acid side chains. *Prog. Biophys. Mol. Biol.* **2000**, *74*, 141–173, [https://doi.org/10.1016/s0079-6107\(00\)00021-3](https://doi.org/10.1016/s0079-6107(00)00021-3).
- Piccirilli, F.; Mangialardo, S.; Postorino, P.; Lupi, S.; Perucchi, A. FTIR analysis of the high pressure response of native insulin assemblies. *J. Mol. Struct.* **2013**, *1050*, 159–165, <https://doi.org/10.1016/j.molstruc.2013.07.028>.
- Piccirilli, F.; Tardani, F.; D'arco, A.; Birarda, G.; Vaccari, L.; Sennato, S.; Casciardi, S.; Lupi, S. Infrared Nanospectroscopy Reveals DNA Structural Modifications upon Immobilization onto Clay Nanotubes. *Nanomaterials* **2021**, *11*, 1103, <https://doi.org/10.3390/nano11051103>.
- Li, H.; Lantz, R.; Du, D. Vibrational Approach to the Dynamics and Structure of Protein Amyloids. *Molecules* **2019**, *24*, 186, <https://doi.org/10.3390/molecules24010186>.
- Ricciardi, V.; Portaccio, M.; Perna, G.; Lasalvia, M.; Capozzi, V.; Cammarata, F.P.; Pisciotto, P.; Petringa, G.; Delfino, I.; Manti, L.; et al. FT-IR Transfection Micro-Spectroscopy Study on Normal Human Breast Cells after Exposure to a Proton Beam. *Appl. Sci.* **2021**, *11*, 540, <https://doi.org/10.3390/app11020540>.
- Surewicz, W.K.; Leddy, J.J.; Mantsch, H.H. Structure, stability, and receptor interaction of cholera toxin as studied by Fourier-transform infrared spectroscopy. *Biochemistry* **1990**, *29*, 8106–8111, <https://doi.org/10.1021/bi00487a017>.
- Jackson, M.; Mantsch, H.H. Beware of proteins in DMSO. *Biochim. et Biophys. Acta (BBA) - Protein Struct. Mol. Enzym.* **1991**, *1078*, 231–235, [https://doi.org/10.1016/0167-4838\(91\)90563-f](https://doi.org/10.1016/0167-4838(91)90563-f).
- Yang, H.; Yang, S.; Kong, J.; Dong, A.; Yu, S. Obtaining information about protein secondary structures in aqueous solution using Fourier transform IR spectroscopy. *Nat. Protoc.* **2015**, *10*, 382–396, <https://doi.org/10.1038/nprot.2015.024>.
- Pelton, J.T.; McLean, L.R. Spectroscopic Methods for Analysis of Protein Secondary Structure. *Anal. Biochem.* **2000**, *277*, 167–176, <https://doi.org/10.1006/abio.1999.4320>.
- Barth, A. Infrared spectroscopy of proteins. *Biochim. Biophys. Acta Bioenerg.* **2007**, *1767*, 1073–1101, <https://doi.org/10.1016/j.bbabi.2007.06.004>.
- Seshadri, S.; Khurana, R.; Fink, A.L. Fourier transform infrared spectroscopy in analysis of protein deposits. **1999**, *309*, 559–576, [https://doi.org/10.1016/s0076-6879\(99\)09038-2](https://doi.org/10.1016/s0076-6879(99)09038-2).
- Walls, A.C.; Tortorici, M.A.; Frenz, B.; Snijder, J.; Li, W.; A Rey, F.; DiMaio, F.; Bosch, B.-J.; Veisler, D. Glycan shield and epitope masking of a coronavirus spike protein observed by cryo-electron microscopy. *Nat. Struct. Mol. Biol.* **2016**, *23*, 899–905, <https://doi.org/10.1038/nsmb.3293>.
- Walls, A.; Tortorici, M.A.; Bosch, B.-J.; Frenz, B.; Rottier, P.J.M.; DiMaio, F.; Rey, F.A.; Veisler, D. Crucial steps in the structure determination of a coronavirus spike glycoprotein using cryo-electron microscopy. *Protein Sci.* **2016**, *26*, 113–121, <https://doi.org/10.1002/pro.3048>.
- Walls, A.C.; Tortorici, M.A.; Snijder, J.; Xiong, X.; Bosch, B.-J.; Rey, F.A.; Veisler, D. Tectonic conformational changes of a coronavirus spike glycoprotein promote membrane fusion. *Proc. Natl. Acad. Sci. USA* **2017**, *114*, 11157–11162, <https://doi.org/10.1073/pnas.1708727114>.



15. Xiong, X.; Tortorici, M.A.; Snijder, J.; Yoshioka, C.; Walls, A.C.; Li, W.; McGuire, A.T.; Rey, F.A.; Bosch, B.-J.; Veerler, D. Glycan Shield and Fusion Activation of a Deltacoronavirus Spike Glycoprotein Fine-Tuned for Enteric Infections. *J. Virol.* **2018**, *92*, <https://doi.org/10.1128/jvi.01628-17>.
16. Andersen, K.G.; Rambaut, A.; Lipkin, W.I.; Holmes, E.C.; Garry, R.F. The proximal origin of SARS-CoV-2. *Nat. Med.* **2020**, *26*, 450–452, <https://doi.org/10.1038/s41591-020-0820-9>.
17. Shajahan, A.; Supekar, N.T.; Gleinich, A.S.; Azadi, P. Deducing the N- and O-glycosylation profile of the spike protein of novel coronavirus SARS-CoV-2. *Glycobiology* **2020**, *30*, 981–988, <https://doi.org/10.1093/glycob/cwaa042>.
18. Imperiali, B.; E O'connor, S. Effect of N-linked glycosylation on glycopeptide and glycoprotein structure. *Curr. Opin. Chem. Biol.* **1999**, *3*, 643–649, [https://doi.org/10.1016/s1367-5931\(99\)00021-6](https://doi.org/10.1016/s1367-5931(99)00021-6).
19. Wormald, M.R.; A Dwek, R. Glycoproteins: glycan presentation and protein-fold stability. *Structure* **1999**, *7*, R155–R160, [https://doi.org/10.1016/s0969-2126\(99\)80095-1](https://doi.org/10.1016/s0969-2126(99)80095-1).
20. Cui, J.; Li, F.; Shi, Z.-L. Origin and evolution of pathogenic coronaviruses. *Nat. Rev. Microbiol.* **2019**, *17*, 181–192, <https://doi.org/10.1038/s41579-018-0118-9>.
21. Petersen, E.; Koopmans, M.; Go, U.; Hamer, D.H.; Petrosillo, N.; Castelli, F.; Storgaard, M.; Al Khalili, S.; Simonsen, L. Comparing SARS-CoV-2 with SARS-CoV and influenza pandemics. *Lancet Infect. Dis.* **2020**, *20*, e238–e244, [https://doi.org/10.1016/s1473-3099\(20\)30484-9](https://doi.org/10.1016/s1473-3099(20)30484-9).
22. Pallesen, J.; Wang, N.; Corbett, K.S.; Wrapp, D.; Kirchdoerfer, R.N.; Turner, H.L.; Cottrell, C.A.; Becker, M.M.; Wang, L.; Shi, W.; et al. Immunogenicity and structures of a rationally designed prefusion MERS-CoV spike antigen. *Proc. Natl. Acad. Sci. USA* **2017**, *114*, E7348–E7357, <https://doi.org/10.1073/pnas.1707304114>.
23. Kačuráková, M.; Mathlouthi, M. FTIR and laser-Raman spectra of oligosaccharides in water: characterization of the glycosidic bond. *Carbohydr. Res.* **1996**, *284*, 145–157, [https://doi.org/10.1016/0008-6215\(95\)00412-2](https://doi.org/10.1016/0008-6215(95)00412-2).
24. Wiercigroch, E.; Szafraniec, E.; Czamara, K.; Pacia, M.Z.; Majzner, K.; Kochan, K.; Kaczor, A.; Baranska, M.; Malek, K. Raman and infrared spectroscopy of carbohydrates: A review. *Spectrochim. Acta Part A Mol. Biomol. Spectrosc.* **2017**, *185*, 317–335, <https://doi.org/10.1016/j.saa.2017.05.045>.
25. Khajehpour, M.; Dashnau, J.L.; Vanderkooi, J.M. Infrared spectroscopy used to evaluate glycosylation of proteins. *Anal. Biochem.* **2006**, *348*, 40–48, <https://doi.org/10.1016/j.ab.2005.10.009>.
26. Lisowska, E. The role of glycosylation in protein antigenic properties. *Cell. Mol. Life Sci.* **2002**, *59*, 445–455, <https://doi.org/10.1007/s00018-002-8437-3>.

**Disclaimer/Publisher's Note:** The statements, opinions and data contained in all publications are solely those of the individual author(s) and contributor(s) and not of MDPI and/or the editor(s). MDPI and/or the editor(s) disclaim responsibility for any injury to people or property resulting from any ideas, methods, instructions or products referred to in the content.
