# Supplementary material for: Secondary Structures of MERS-CoV, SARS-CoV, and SARS-CoV-2 Spike Proteins Revealed by Infrared Vibrational Spectroscopy
Source: MDPI journal article supplement (doi:10.3390/ijms24119550), 2023-05-31
Supplement: s1 [file s1]

```
#####
# Program: needle
# Rundate: Wed 11 Jan 2023 08:38:40
# Commandline: needle
#   -auto
#   -stdout
#   -asequence emboss_needle-I20230111-084136-0084-12866431-p1m.asequence
#   -bsequence emboss_needle-I20230111-084136-0084-12866431-p1m.bsequence
#   -datafile EBLOSUM62
#   -gapopen 10.0
#   -gapextend 0.5
#   -endopen 10.0
#   -endextend 0.5
#   -aformat3 pair
#   -sprotein1
#   -sprotein2
# Align_format: pair
# Report_file: stdout
#####

#=====
#
# Aligned_sequences: 2
# 1: SARS-CoV-2
# 2: SARS-CoV
# Matrix: EBLOSUM62
# Gap_penalty: 10.0
# Extend_penalty: 0.5
#
# Length: 692
# Identity:      449/692 (64.9%)
# Similarity:    544/692 (78.6%)
# Gaps:          38/692 ( 5.5%)
# Score: 2470.0
#
#
#=====

SARS-CoV-2      1  -----VNLTRTQLPPAYTNSFTRGVYYPDKVFRSSVLHSTQDL      39
                  |.....|      :|:. |||||:|:|..|:|
SARS-CoV        1  SLDLRCCTTFDDVQAPNYTQ---HTSSM-RGVYYPDEIFRSDTLYLTDL      45

SARS-CoV-2     40  FLPFFSNVTWFHAIHVSGTNGTKRFDNPVLPFNDGVYFASTEKSNIIRGW      89
                  |||:||||.||. |. | |||:|. |:|:|:|:|:|
SARS-CoV       46  FLFPYSNVTGFHTI-----NHT--FDNPVIPFKDGIYFAATEKSNVVRGW      88

SARS-CoV-2     90  IFGTTLDSTQSLLLIVNNATNVVIVKCEQFCNDPFLGVYYHKNNKSWME     139
                  :|:|:|:|:|:|:|:|:|:|:|:|.|. |:|:|:|..|      :.....:
SARS-CoV      89  VFGSTMNNKSQSVIIINNSTNVVIRACNFECDNPFFAV----SKPMGTQ     134

SARS-CoV-2    140  SEFRVYSSANNCTFEYVSQPFLMDLEGKQGNFKNLREFVFKNIDGYFKIY     189
                  :...:|. | |||:|. |. |:|:|. | |||:| |||||. |:|:|
SARS-CoV     135  THTMIFDNAFNCTFEYISDAFSLDVSEKSGNFKHLREFVFKNKDGFYVY     184

SARS-CoV-2    190  SKHTPINLVRDLPQGFSALEPLVDLPIGINITRFQTLALHRSYLTGDS      239
                  ...:|:|:| |||. |:|. |:|:|:|:|:| |||. |:|:|      :...|...
SARS-CoV     185  KGYQPIDVVRDLPSPGFNTLKPFIKPLGINITNFRAIL----TAFSPAQD      230

SARS-CoV-2    240  SSGWTAGAAAYVGYLQPRFTLLKYNENGTITDAVDCALDPLSETKCTLK      289
                  : |...| |||:| |||:|. |:|:|:| ||||| |||||:|:|:|. |:|:|
SARS-CoV     231  T--WGTSAAYFVGYLKPTTFMLKYDENGITDAVDCSQNPLAELKCSVK      278

SARS-CoV-2    290  SFTVEKGIYQTSNFRVQPTESIVRFPNITNLCPFGEVFNATRFASVYAWN     339
                  ||.:|:| ||||| |||. |:|:|:| ||||| |||||:|:| |||||.
SARS-CoV     279  SFEIDKGIYQTSNFRVPSGDVVRFPNITNLCPFGEVFNATKFPSVYAW     328

SARS-CoV-2    340  RKRISNCVADYSVLVNSASFSTFKCYGVSPTKLNDLCFTNVYADSFVIRG     389
                  |:| ||||| ||||| |||. |:| ||||| |||. |:| |||||:|:|
```

|                 |                                                                                                                                                                                                                                                       |                                                     |     |
|-----------------|-------------------------------------------------------------------------------------------------------------------------------------------------------------------------------------------------------------------------------------------------------|-----------------------------------------------------|-----|
| 11/01/23, 09:42 | <a href="https://www.ebi.ac.uk/Tools/services/rest/emboss_needle/result/emboss_needle-l20230111-084136-0084-12866431-p1m/aln">https://www.ebi.ac.uk/Tools/services/rest/emboss_needle/result/emboss_needle-l20230111-084136-0084-12866431-p1m/aln</a> |                                                     |     |
| SARS-CoV        | 329                                                                                                                                                                                                                                                   | RKKISNCVADYSVLYNSTFFSTFKCYGVSATKLNDLCFSNVYADSFVVKG  | 378 |
| SARS-CoV-2      | 390                                                                                                                                                                                                                                                   | DEV RQIAPGQTGKIADYNYKLPDDFTGCVIAWNSNNLDSKVGGNYNLYR  | 439 |
| SARS-CoV        | 379                                                                                                                                                                                                                                                   | DDVRQIAPGQTGVIADYNYKLPDDFMGCVLAWNTRNIDATSTGNYNKYR   | 428 |
| SARS-CoV-2      | 440                                                                                                                                                                                                                                                   | LFRKSNLKPFERDISTEIQAGSTPCNGVEGFNCYFPLQSYGFQPTNGVG   | 489 |
| SARS-CoV        | 429                                                                                                                                                                                                                                                   | YLRHGKLRPFERDISNVPFSPDGK PCT-PPALNCYWPLNDYGFYTTTGIG | 477 |
| SARS-CoV-2      | 490                                                                                                                                                                                                                                                   | YQPYRVVLSFELLHAPATVCGPKKSTNLVKNKCVNFNFNGLTGTGVLTE   | 539 |
| SARS-CoV        | 478                                                                                                                                                                                                                                                   | YQPYRVVLSFELLNAPATVCGPKLSTDLIKNCVNFNFNGLTGTGVLTP    | 527 |
| SARS-CoV-2      | 540                                                                                                                                                                                                                                                   | SNKKFLPFQQFGRDIADTTDAVRDPQTLEILDITPCSFGGVSVITPGTNT  | 589 |
| SARS-CoV        | 528                                                                                                                                                                                                                                                   | SSKRFQPFQQFGRDVSDFTDSVRDPKTSEILDISPCSFGGVSVITPGTNA  | 577 |
| SARS-CoV-2      | 590                                                                                                                                                                                                                                                   | SNQVAVLYQDVNCTEVPVAIHADQLTPTWRVYSTGSNVFQTRAGCLIGAE  | 639 |
| SARS-CoV        | 578                                                                                                                                                                                                                                                   | SSEVAVLYQDVNCTDVSTAIHADQLTPAWRIYSTGNNVFQTQAGCLIGAE  | 627 |
| SARS-CoV-2      | 640                                                                                                                                                                                                                                                   | HVNNSYECDIPIGAGICASYQTQTNSPRRARAHAAAAAAAAAAAA       | 681 |
| SARS-CoV        | 628                                                                                                                                                                                                                                                   | HVDTSYECDIPIGAGICASYHTVS----LLRAAAAAAAAAAAAA        | 665 |

#-----  
#-----
