# Supplementary material for: Secondary Structures of MERS-CoV, SARS-CoV, and SARS-CoV-2 Spike Proteins Revealed by Infrared Vibrational Spectroscopy
Source: MDPI journal article supplement (doi:10.3390/ijms24119550), 2023-05-31
Supplement: s1 [file s1]

#####

```
# Program: needle
# Rundate: Wed 11 Jan 2023 08:48:16
# Commandline: needle
#   -auto
#   -stdout
#   -asequence emboss_needle-I20230111-084739-0314-81520469-p1m.asequence
#   -bsequence emboss_needle-I20230111-084739-0314-81520469-p1m.bsequence
#   -datafile EBLOSUM62
#   -gapopen 10.0
#   -gapextend 0.5
#   -endopen 10.0
#   -endextend 0.5
#   -aformat3 pair
#   -sprotein1
#   -sprotein2
# Align_format: pair
# Report_file: stdout
```

#####

#=====

```
#
# Aligned_sequences: 2
# 1: SARS-CoV-2
# 2: SARS-CoV
# Matrix: EBLOSUM62
# Gap_penalty: 10.0
# Extend_penalty: 0.5
#
# Length: 299
# Identity:      160/299 (53.5%)
# Similarity:    219/299 (73.2%)
# Gaps:          27/299 ( 9.0%)
# Score: 881.0
```

#

#

#=====

|            |     |                                                                  |     |
|------------|-----|------------------------------------------------------------------|-----|
| SARS-CoV-2 | 1   | -----TNSFTRGVYYPDKVFRSSVLHSTQDLFLPFSSNVTWFHAIHVS                 | 43  |
|            |     | : .      ::   .  : .      ::   .    .                            |     |
| SARS-CoV   | 1   | APNYTQHTSSM-RGVYYPDEIFRSDTLYLTDQLFLPFYSNVTGFHTI---               | 46  |
| SARS-CoV-2 | 44  | GTNGTKRFDNPVLPFNDGVYFASTEKSNIIRGWIFGTTLDSTQSLIIVN                | 93  |
|            |     | .       : .  : : : : : : : : : : : : : : : :                     |     |
| SARS-CoV   | 47  | --NHT--FDNPVIPFKDGIYFAATEKSNVVRGWVFGSTMNNKSQSVIIIN               | 92  |
| SARS-CoV-2 | 94  | NATNVVIKVCEFQFCNDPFLGVYHKNKSWMESEFRVYSSANNCTFEYV                 | 143 |
|            |     | :    : .  : .  : : : .   :.....:.....: .      :                  |     |
| SARS-CoV   | 93  | NSTNVVIRACNFELCDNPFFAV---SKPMGTQHTMIFDNAFNCTFEYI                 | 138 |
| SARS-CoV-2 | 144 | SQPFLMDLEGKQGNFKNLREFVFKNIDGYFKIYSKHTPINLVRDLPQGFS               | 193 |
|            |     | ..  : .  : .  .     : : : : : : : : : : .  : .  : .  : : : : : : |     |
| SARS-CoV   | 139 | SDAFSLDVSEKSGNFKHLREFVFKNKDGLYVYKGYQPIDVVRDLP SGFN               | 188 |
| SARS-CoV-2 | 194 | ALEPLVDLPIGINITRFQTLALHRSYLT PGDSSSGWTAGAAAYVGYLQ                | 243 |
|            |     | .  : .  : .  : : : : .  : .   :... ...:  ... : : : : :           |     |
| SARS-CoV   | 189 | TLKPIFKLPLGINITNFRAIL----TAFSPAQDT--WGTSAAAYFVGYLK               | 232 |
| SARS-CoV-2 | 244 | PRTFLLKYNENGTITDAVDCALDPLSETKCTLSFTVEKGIYQTSNFRV                 | 292 |
|            |     | .  : : : : : : : : : : : : .  : .  : .  : .  : : : : : :         |     |
| SARS-CoV   | 233 | PTTFMLKYDENGITITDAVDCSQNPLAELKCSVKSFEIDKGIYQTSNF--               | 279 |

#-----

#-----
